# Supplementary material for: Electronic DNA Analysis of CSF Cell-free Tumor DNA to Quantify Multi-gene Molecular Response in Pediatric High-grade Glioma
Source: Oxford University Press journal article supplement (doi:10.1158/1078-0432.ccr-20-2066), 2020-10-21
Supplement: 10780432ccr202066-sup-244202_2_supp_6550197_qg55p5.xlsx [file 10780432ccr202066-sup-244202_2_supp_6550197_qg55p5.xlsx]

## Sheet: S3
S3A	Patient UMPED	Experiment Number	Tissue Type	Normal/Tumor	Gene Mutation	Nanopore VAF % (all replicates)	Standard Deviation %	MiOncoseq VAF %	True Positive	True Negative	False Positive	False Negative		S3B		Total Samples (n)	True Positive	True Negative	False Positive	False Negative	Sensitivity	Specificity
	18	15	Tissue	Tumor	H3F3A K27M	48.3	0	N/A	1	0	0	0			All	188	99	68	0	21	0.825	1
		18	CSF	Normal	H3F3A K27M	1.23	0	N/A	0	1	0	0			CSF	188	72	42	0	13	0.847059	1
		27	Tissue	Tumor	H3F3A K27M	48.5865	0.668605	57	2	0	0	0			Tissue		27	26	0	8	0.771429	1
						49.532									Autopsy	153	56	33	0	12	0.823529	1
		29	Tissue	Tumor	H3F3A K27M	49.02	N/A	57	1	0	0	0			Living		43	0	0	9	0.826923	N/A
		57	Tissue	Tumor	H3F3A K27M	44.4036	0.49321	55	2	0	0	0
						43.7061
					PIK3CA E545K	28.752	0.146627	36	2	0	0	0
						28.5446
			CSF	Tumor	H3F3A K27M	29.7757	0.456266	55	2	0	0	0
						29.1305
					PIK3CA E545K	21.2117	2.49715	36	2	0	0	0
						24.7432
			Tissue	Normal	H3F3A K27M	1.2386	0.00166179	26	0	2	0	0
						1.24095
					PIK3CA E545K	0.978696	0.0343751	26	0	2	0	0
						1.02731
		58	Tissue	Normal	HIST1H3B K28M	0.870964	0.0438673	N/A	0	2	0	0
						0.808926
					ACVR1 G328E	0.954219	2.49715	N/A	0	2	0	0
						1.32319
					TP53 R213*	1.36581	2.49715	N/A	0	2	0	0
						1.48977
	22	27	CSF	Tumor	HIST1H3B K28M	9.64294	1.11481	22	2	0	0	0
						11.2195
					ACVR1_7	4.32043	0.063646	23	2	0	0	0
						4.23042
		44	Tissue	Tumor	TP53 R213*	66.6803	0.158452	45	2	0	0	0
						66.9044
					ACVR1 G328E	38.0205	0.465277	23	2	0	0	0
						38.6785
		58	CSF	Tumor	HIST1H3B K28M	8.08262	0.0925646	22	2	0	0	0
						8.21352
					ACVR1 G328E	10.8669	0.0487486	23	2	0	0	0
						10.798
					TP53 R213*	13.5024	0.441353	45	2	0	0	0
						14.1265
			Tissue	Tumor	HIST1H3B K28M	19.9901	0.619503	22	2	0	0	0
						20.8662
					ACVR1 G328E	25.8662	0.219877	23	2	0	0	0
						25.5552
					TP53 R213*	35.0112	0.270265	45	2	0	0	0
						35.3934
		63	Tissue	Normal	ATRX Q119st	1.37206	0	N/A	0	3	0	0
						1.37206
						1.37206
	24	29	CSF	Tumor	H3F3A K27M	0.810216	0.747039	24	0	0	0	9
						0.794048
						0.816477
						0.837363
						0.926789
						0.841683
						2.2992
						2.44726
						2.23121
	25	19	CSF	Tumor	H3F3A K27M	10.0348	N/A	47	1	0	0	0
	37	23	Tissue	Normal	H3F3A K27M	1.26786	N/A	N/A	0	1	0	0
					HIST1H3B K28M	0.752571	N/A	N/A	0	1	0	0
		24	Tissue	Normal	H3F3A K27M	1.19889	N/A	N/A	0	1	0	0
					HIST1H3B K28M	0.833849	N/A	N/A	0	1	0	0
		28	Tissue	Normal	H3F3A K27M	1.13636	N/A	N/A	0	1	0	0
					HIST1H3B K28M	1.33688	N/A	N/A	0	1	0	0
					ACVR1_7	0.940462	N/A	N/A	0	1	0	0
		44	CSF	Tumor	TP53 R213*	1.2883	0.00459026	N/A	0	0	0	2
						1.2818
			CSF	Tumor	EGFR V292L	42.0686	N/A	45	1	0	0	0
			Tissue	Tumor	TP53 R213*	1.17251	N/A	N/A	0	0	0	1
			Tissue	Tumor	EGFR V292L	41.7895	N/A	45	1	0	0	0
		55	Tissue	Normal	H3F3A K27M	1.48079	0.0664986	N/A	0	2	0	0
						1.57483
			Tissue	Normal	PPM1D E525*	0.546521	0.0839497	N/A	0	2	0	0
						0.665244
			Tissue	Normal	ATRX Q119*	2.31358	0.0485037	N/A	0	2	0	0
						2.38218
	57	28	CSF	Tumor	H3F3A K27M	13.4488	0.348856	47	3	0	0	0
						13.4025
						14.0286
			CSF	Normal	ACVR1_7	0.901588	0.0567151	N/A	0	3	0	0
						1.01207
						0.979089
		45	CSF	Tumor	H3F3A K27M	40.8341	N/A	47	1	0	0	0
		55	Tissue	Tumor	H3F3A K27M	49.0376	0.0173961	47	2	0	0	0
						49.0622
			Tissue	Tumor	PPM1D E525*	47.9917	0.558888	43	2	0	0	0
						47.2013
			Tissue	Tumor	ATRX Q119*	1.9451	0.247774	N/A	0	0	0	2
						2.29551
		62	CSF	Tumor	H3F3A K27M	37.7624	0.32328	47	3	0	0	0
						37.7561
						37.1993
			CSF	Tumor	PPM1D E525st	32.3169	0.568907	43	3	0	0	0
						33.4051
						33.1489
	58	28	CSF	Tumor	H3F3A K27M	3.95264	0.240863	N/A	3	0	0	0
						3.70509
						3.47098
			CSF	Normal	ACVR1_7	1.00689	0.027138	N/A	0	3	0	0
						0.952648
						0.978091
		55	Tissue	Tumor	H3F3A K27M	26.4512	0.600803	N/A	2	0	0	0
						27.3009
			Tissue	Tumor	PPM1D E525*	0.691069	0.0266352	N/A	0	0	0	2
						0.728737
			Tissue	Tumor	ATRX Q119*	2.46696	0.0732948	79	0	0	0	2
						2.36331
		63	Tissue	Tumor	ATRX Q119st	37.7624	21.0028	78	2	0	0	1
						37.7561
						1.38127
			CSF	Tumor	ATRX Q119st	1.45424	20.6612	78	1	0	0	2
						37.1993
						1.37206
	60	50	CSF	Tumor	H3F3A K27M	12.9317	8.68772	34	9	0	0	0
						13.1454
						12.9561
						21.4005
						21.1701
						21.0245
						1.18387
						1.18881
						1.35831
			CSF	Tumor	PIK3CA E545G	23.1449	12.5032	34	6	0	0	0
						36.1344
						35.4621
						10.5677
						10.0863
						10.4687
			CSF	Tumor	TP53 R158G	41.9391	19.4178	45	6	0	0	0
						41.3869
						42.188
						6.23249
						6.33755
						6.59974
			CSF	Tumor	TP53 R248Q	33.9137	13.2296	43	9	0	0	0
						32.6098
						33.1149
						30.3605
						30.3133
						30.2571
						6.11141
						4.72653
						5.48004
		53	CSF	Tumor	H3F3A K27M	15.723	0.410386	34	3	0	0	0
						16.053
						15.2372
			CSF	Tumor	PIK3CA E545G	37.1671	0.56035	34	3	0	0	0
						36.816
						36.0698
			CSF	Tumor	TP53 R158G	26.2862	0.492598	45	3	0	0	0
						26.7931
						25.8081
			CSF	Tumor	TP53 R248Q	30.4491	0.203781	43	3	0	0	0
						30.1952
						30.5983
	NTC03	27	CSF	Normal	H3F3A K27M	1.25066	0.0214062	N/A	0	2	0	0
						1.22039
					HIST1H3B K28M	1.55997	0.242186	N/A	0	2	0	0
						1.21746
					ACVR1_7	0.30003	0.0212153	N/A	0	2	0	0
						0.270027
		29	CSF	Normal	H3F3A K27M	0.728455	0.0604672	N/A	0	2	0	0
						0.813969
		62	CSF	Normal	H3F3A K27M	1.38127	0.045021	N/A	0	3	0	0
						1.45424
						1.37206
					PPM1D E525st	0.69119	0.0119205	N/A	0	3	0	0
						0.667353
						0.67889
		50	CSF	Normal	PIK3CA E545G	1.31444	0.128388	N/A	0	3	0	0
						1.12727
						1.06863
					TP53 R158G	0.232567	0.0167148	N/A	0	3	0	0
						0.203387
						0.232105
					TP53 R248Q	0.978859	0.102624	N/A	0	3	0	0
						1.17747
						1.03334
	NTC06	53	CSF	Normal	H3F3A K27M	1.63727	0.039784	N/A	0	3	0	0
						1.66685
						1.71603
					PIK3CA E545G	1.41904	0.100194	N/A	0	3	0	0
						1.57721
						1.39157
					TP53 R158G	0.400837	0.0357219	N/A	0	3	0	0
						0.329649
						0.370479
					TP53 R248Q	0.808543	0.401636	N/A	0	3	0	0
						1.50355
						0.807249
